# Supplementary material for: Assessment of free fatty acids and cholesteryl esters delivered in liposomes as novel class of antibiotic
Source: PubMed Central journal article supplement (PMC4938966; doi:10.1186/s13104-016-2138-8), 2016-07-08
Supplement: 13104_2016_2138_MOESM1_ESM.pdf [file 13104_2016_2138_MOESM1_ESM.pdf]

**Cheung *et al.*, Additional File 1: Test lipid composition and particle size**

| Test Lipid               |      | I.D.     | Carrier   | [Test Lipid]<br>mg/ml | [Total Lipid]<br>mg/ml | [Carrier Lipid]<br>mg/ml | Size<br>nm |
|--------------------------|------|----------|-----------|-----------------------|------------------------|--------------------------|------------|
| Carrier                  | None | 037-18A  | Carrier A | 0.00                  | 15                     | 15.00                    | 58         |
|                          | None | 037-09B  | Carrier B | 0.00                  | 10                     | 10.00                    | NA         |
|                          | None | 037-18C  | Carrier C | 0.00                  | 15                     | 15.00                    | 48         |
|                          | None | 037-18D  | Carrier D | 0.00                  | 15                     | 15.00                    | 15         |
|                          | None | 037-09E  | Carrier E | 0.00                  | 10                     | 10.00                    | NA         |
|                          | None | 037-18F  | Carrier F | 0.00                  | 15                     | 15.00                    | 93         |
| Palmitic acid            | PA1  | 037-19I1 | Carrier A | 1.14                  | 15                     | 13.86                    | 47         |
|                          | PA3  | 037-16I2 | Carrier C | 0.86                  | 10                     | 9.14                     | NA         |
|                          | PA4  | 037-16I3 | Carrier D | 1.13                  | 15                     | 13.87                    | 49         |
|                          | PA6  | 037-16I4 | Carrier F | 0.61                  | 7.5                    | 6.89                     | 67         |
|                          | SA1  | 037-17J1 | Carrier A | 0.83                  | 10                     | 9.17                     | 3246       |
| Stearic acid             | SA3  | 037-17J2 | Carrier C | 0.95                  | 10                     | 9.05                     | 553        |
|                          | SA4  | 037-17J3 | Carrier D | 0.83                  | 10                     | 9.17                     | 25         |
|                          | SA6  | 037-17J4 | Carrier F | 0.45                  | 5                      | 4.55                     | 187        |
| Oleic acid               | OA1  | 037-16H1 | Carrier A | 0.83                  | 10                     | 9.17                     | 31         |
|                          | OA3  | 037-16H2 | Carrier C | 0.94                  | 10                     | 9.06                     | 29         |
|                          | OA4  | 037-16H3 | Carrier D | 0.83                  | 10                     | 9.17                     | 13         |
|                          | OA6  | 037-16H4 | Carrier F | 0.45                  | 5                      | 4.55                     | 21         |
| Linoleic acid            | LA1  | 037-15G1 | Carrier A | 0.82                  | 10                     | 9.18                     | 31         |
|                          | LA3  | 037-15G2 | Carrier C | 0.94                  | 10                     | 9.06                     | 250        |
|                          | LA4  | 037-15G3 | Carrier D | 0.82                  | 10                     | 9.18                     | 72         |
|                          | LA6  | 037-15G4 | Carrier F | 0.44                  | 5                      | 4.56                     | 17         |
| Arachidonic acid         | AA1  | 037-15F1 | Carrier A | 0.89                  | 10                     | 9.11                     | 155        |
|                          | AA3  | 037-15F2 | Carrier C | 1.01                  | 10                     | 8.99                     | 99         |
|                          | AA4  | 037-15F3 | Carrier D | 0.88                  | 10                     | 9.12                     | 69         |
|                          | AA6  | 037-15F4 | Carrier F | 0.48                  | 5                      | 4.52                     | 17         |
| Docosahexaenoic acid     | DA1  | 037-05B1 | Carrier A | 0.95                  | 10                     | 9.05                     | NA         |
|                          | DA3  | 037-05B2 | Carrier C | 1.08                  | 10                     | 8.92                     | NA         |
|                          | DA4  | 037-05B3 | Carrier D | 0.95                  | 10                     | 9.05                     | NA         |
|                          | DA6  | 037-16B4 | Carrier F | 0.50                  | 10                     | 9.50                     | NA         |
| Cholesteryl palmitate    | CP1  | 037-07C1 | Carrier A | 0.83                  | 5                      | 4.17                     | NA         |
|                          | CP2  | 037-07C4 | Carrier B | 0.88                  | 5                      | 4.12                     | NA         |
|                          | CP3  | 037-07C2 | Carrier C | 0.94                  | 5                      | 4.06                     | NA         |
|                          | CP5  | 037-07C6 | Carrier E | 0.67                  | 5                      | 4.33                     | NA         |
| Cholesteryl oleate       | CO1  | 037-14E1 | Carrier A | 0.86                  | 5                      | 4.14                     | 68         |
|                          | CO3  | 037-14E2 | Carrier C | 0.97                  | 5                      | 4.03                     | 37         |
|                          | CO4  | 037-14E3 | Carrier D | 0.86                  | 5                      | 4.14                     | 71         |
| Cholesteryl linoleate    | CL1  | 037-05A1 | Carrier A | 0.86                  | 5                      | 4.14                     | NA         |
|                          | CL3  | 037-05A2 | Carrier C | 0.97                  | 5                      | 4.03                     | NA         |
|                          | CL4  | 037-05A3 | Carrier D | 0.86                  | 5                      | 4.14                     | NA         |
| Cholesteryl arachidonate | CA1  | 037-14D1 | Carrier A | 0.89                  | 5                      | 4.11                     | 86         |
|                          | CA3  | 037-14D2 | Carrier C | 0.99                  | 5                      | 4.01                     | 59         |
|                          | CA4  | 037-14D3 | Carrier D | 0.88                  | 5                      | 4.12                     | 75         |

NA: data not available
